# Supplementary material for: Comparability of a Blood-Pressure-Monitoring Smartphone Application with Conventional Measurements—A Pilot Study
Source: MDPI journal article supplement (doi:10.3390/diagnostics12030749), 2022-03-19
Supplement: s1 [file s1]

## Supplemental Table S1:

*Supplemental Table S1: Average per-participant AppBP – CuffBP for calibrated AppBP.*

| Mean AppBP – CuffBP | Day1 and Day2 n=19 |           | Day1 n=19 |           | Day2 n=15 |           |
|---------------------|--------------------|-----------|-----------|-----------|-----------|-----------|
|                     | Systolic           | Diastolic | Systolic  | Diastolic | Systolic  | Diastolic |
| Mean                | 1.7                | 1.1       | 1.8       | 1.5       | 2.7       | 1.4       |
| Std. deviation      | 5.5                | 3.2       | 9.8       | 4.7       | 7.2       | 3.7       |
| Minimum             | -8.7               | -4.7      | -18.4     | -6.1      | -7.3      | -5.4      |
| Maximum             | 12.4               | 7.1       | 31.0      | 15.3      | 20.4      | 8.9       |

## Supplemental Figure S1:

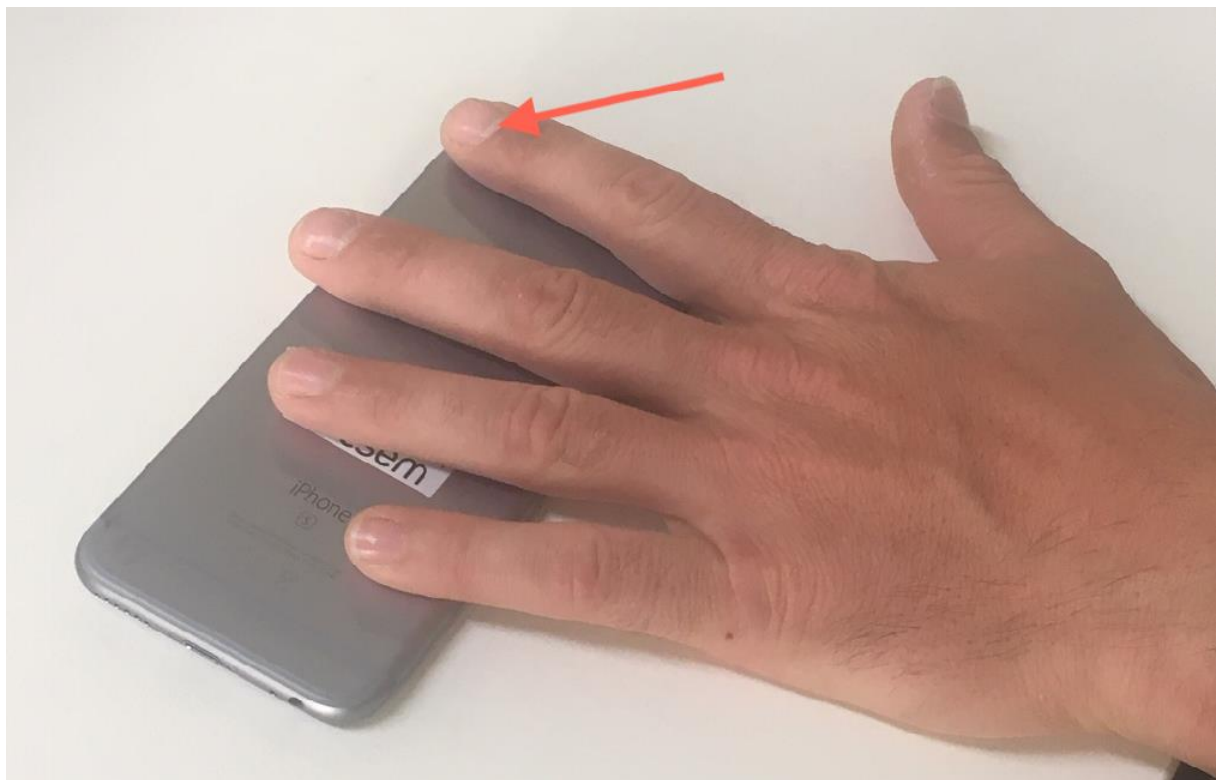

*Supplemental Figure S1: Correct positioning of the patient's finger during the measurement. The arrow is pointing to the position of the camera.*
